# Supplementary material for: Management and educational status of adult anaphylaxis patients at emergency department
Source: PubMed Central journal article supplement — Korean J Intern Med. 2017 Dec 28;33(5):1008–15. doi: 10.3904/kjim.2016.024 (PMC6129625; doi:10.3904/kjim.2016.024), 2017-12-28
Supplement: kjim-2016-024-suppl.pdf [file kjim-2016-024-suppl.pdf]

**Supplementary Table 1. Distribution of patients by World Allergy Organization diagnostic criteria for anaphylaxis**

| Criteria                | No. (%)    |
|-------------------------|------------|
| Criteria 1 <sup>a</sup> | 73 (37.6)  |
| Criteria 2 <sup>b</sup> | 110 (56.7) |
| Criteria 3 <sup>c</sup> | 2 (1.0)    |

Nine patients could not be assessed because of insufficient information.

<sup>a</sup>Criteria 1: sudden onset of an illness, with involvement of the skin, mucosal tissue, or both and at least one of the following: sudden respiratory symptoms and signs or sudden reduced blood pressure (BP) or symptoms of end-organ dysfunction.

<sup>b</sup>Criteria 2: two or more of the following that occur suddenly after exposure to a likely allergen or other trigger for that patient: sudden skin or mucosal symptoms and signs, sudden respiratory symptoms and signs, sudden reduced BP or symptoms of end-organ dysfunction or sudden gastrointestinal symptoms.

<sup>c</sup>Criteria 3: reduced BP after exposure to a known allergen for that patient.
